# Supplementary material for: Prevalence, Risk Factors, and Molecular Epidemiology of Intestinal Carbapenem-Resistant Pseudomonas aeruginosa
Source: PubMed Central journal article supplement (PMC8612150; doi:10.1128/spectrum.01344-21), 2021-11-24
Supplement: spectrum01344-21_supp_2_seq4.pdf [file spectrum01344-21_supp_2_seq4.pdf]

Table S2. Primers for PCR amplification of the *bla*<sub>KPC</sub> surrounding sequences

| Primer name                     | No. in Fig. S1 | Primer sequence (5'-3') |
|---------------------------------|----------------|-------------------------|
| 1011-IS26                       | 1F             | AACGCGGAGTGAATGTCGAT    |
| 1011-Tn3 transposase            | 1R             | CTGCTTACCAGGCGCATTTC    |
| 1011-Tn3 transposase            | 2F             | TCCAGAAGGCCTTCCAGCACA   |
| 1011-Tn3 resolvase              | 2R             | AACCGAACCGCGACACCCTGA   |
| 1011-Tn3 resolvase              | 3F             | ACAAGGCATCCGGCAGTTCAA   |
| 1011-IS <i>Kpn8</i> transposase | 3R             | CGCAGCGTCGATTCCAGTTC    |
| 1011-IS <i>Kpn8</i> transposase | 4F             | GTGGAGCTGCGCAAGACGTT    |
| 1011-KPC-2                      | 4R             | CCAGACGACGGCATAGTCAT    |
| 1011-KPC-2                      | 5F             | CGGAGACAAAACCGGAACCT    |
| 1011-IS <i>Kpn6</i>             | 5R             | GACCACAAGGCGATGAGCTA    |
| 1011-hp                         | 6F             | AGGCGATAACCATTTAGCCCG   |
| 1011-IS26                       | 6R             | AACGCGGAGTGAATGTCGAT    |
| 14057-IS <i>Kpn8</i>            | 7F             | AGCTTGACGATCTTGACGGG    |
| 14057-IS6100                    | 7R             | TCGAATCCCTTGATCGTGGC    |
| 14057-Tn1403 transposase        | 8F             | GTTGTAGGTAGGTGCGCAGT    |
| 14057-hp                        | 8R             | AGGCGATAACCATTTAGCCCG   |
| novel-IS26                      | 9F             | ACGATTTACCGCTGGGTTC     |
| novel-IS <i>Kpn8</i>            | 9R             | GCTTGACGATCTTGACGGGA    |

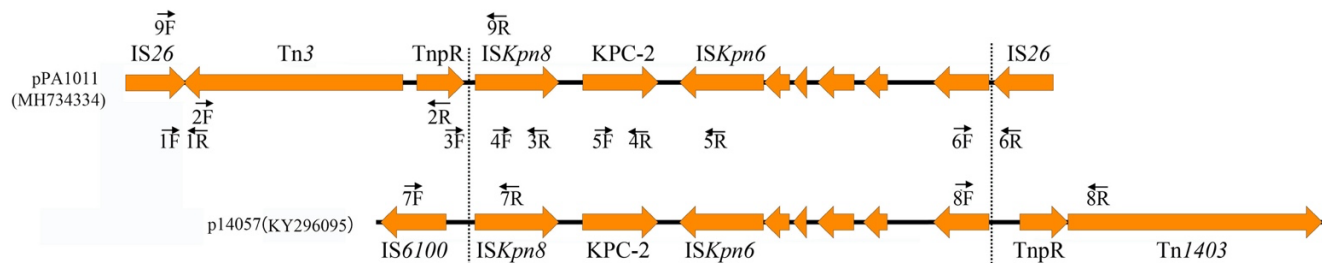

Fig. S1: Genetic environment of *bla*<sub>KPC-2</sub> in pPA1011 and p14057.
